# Supplementary material for: Adaptive designs undertaken in clinical research: a review of registered clinical trials
Source: Springer Nature journal article supplement (doi:10.1186/s13063-016-1273-9), 2016-03-18
Supplement: MOESM1 [file 9783164]

---

Search terms

---

Adaptive

Interim

Dose selection

Bayesian

Futility

Enrichment

Stopping rule

Seamless

Group sequential

Go/no go

Preplanned

MAMS/Multi-stage/multiple stage/multiple arm

Active learning

Accumulating data

Continuous reassessment

Reanalysis

Pick the winner

Internal pilot

Drop the loser

Dose escalation

Sample size adjustment/Sample size re-estimation/Sample size modification

---
