# Supplementary material for: Adaptive designs undertaken in clinical research: a review of registered clinical trials
Source: Springer Nature journal article supplement (doi:10.1186/s13063-016-1273-9), 2016-03-18
Supplement: MOESM2 [file 9783164]

| Variable                  | Phase II          |                  | Phase II/III      |                  | Phase III         |                  | All Phases<br>Total<br>(n=143) |
|---------------------------|-------------------|------------------|-------------------|------------------|-------------------|------------------|--------------------------------|
|                           | Private<br>(n=60) | Public<br>(n=15) | Private<br>(n=19) | Public<br>(n=13) | Private<br>(n=22) | Public<br>(n=14) |                                |
| Disease area              | 10 (17)           | 4 (27)           | 4 (21)            | 6 (46)           | 7 (32)            | 4 (29)           | 35 (24)                        |
| Oncology                  | 0 (0)             | 0 (0)            | 0 (0)             | 0 (0)            | 1 (5)             | 1 (7)            | 2 (1)                          |
| Stroke                    | 8 (13)            | 1 (7)            | 3 (16)            | 1 (8)            | 1 (5)             | 1 (7)            | 15 (10)                        |
| Mental health             | 3 (5)             | 0 (0)            | 1 (5)             | 0 (0)            | 0 (0)             | 0 (0)            | 4 (3)                          |
| Dementia                  | 2 (3)             | 2 (13)           | 0 (0)             | 0 (0)            | 2 (9)             | 2 (14)           | 8 (6)                          |
| Cardiology                | 9 (15)            | 1 (7)            | 3 (16)            | 1 (8)            | 1 (5)             | 0 (0)            | 15 (10)                        |
| Musculoskeletal           | 3 (5)             | 0 (0)            | 3 (16)            | 0 (0)            | 1 (5)             | 1 (7)            | 8 (6)                          |
| Respiratory               | 3 (5)             | 0 (0)            | 0 (0)             | 1 (8)            | 0 (0)             | 1 (7)            | 5 (3)                          |
| Immunodeficiency          | 3 (5)             | 2 (13)           | 0 (0)             | 0 (0)            | 0 (0)             | 1 (7)            | 6 (4)                          |
| Primary care              | 2 (3)             | 0 (0)            | 1 (5)             | 0 (0)            | 3 (14)            | 0 (0)            | 6 (4)                          |
| Diabetes                  | 9 (15)            | 1 (7)            | 1 (5)             | 1 (8)            | 1 (5)             | 2 (14)           | 15 (10)                        |
| Oral and gastroenterology | 2 (3)             | 1 (7)            | 0 (0)             | 0 (0)            | 0 (0)             | 0 (0)            | 3 (2)                          |
| HIV                       | 2 (3)             | 1 (7)            | 1 (5)             | 1 (8)            | 3 (14)            | 1 (7)            | 9 (6)                          |
| Learning difficulties     | 2 (3)             | 1 (7)            | 0 (0)             | 0 (0)            | 1 (5)             | 0 (0)            | 4 (3)                          |
| Other <sup>1</sup>        | 4 (7)             | 2 (13)           | 2 (11)            | 2 (15)           | 1 (5)             | 0 (0)            | 11 (8)                         |
| Stopping rules            | 8 (13)            | 7 (47)           | 2 (11)            | 1 (8)            | 3 (14)            | 2 (14)           | 23 (16)                        |
| Efficacy                  | 0 (0)             | 0 (0)            | 1 (5)             | 0 (0)            | 0 (0)             | 0 (0)            | 1 (1)                          |
| Safety                    | 0 (0)             | 0 (0)            | 0 (0)             | 1 (8)            | 0 (0)             | 0 (0)            | 1 (1)                          |
| Futility                  | 43 (72)           | 5 (33)           | 12 (63)           | 4 (31)           | 13 (59)           | 4 (29)           | 81 (57)                        |
| Efficacy/safety           | 1 (2)             | 1 (7)            | 0 (0)             | 2 (15)           | 1 (5)             | 1 (7)            | 6 (4)                          |
| Efficacy/futility         | 0 (0)             | 0 (0)            | 0 (0)             | 0 (0)            | 0 (0)             | 1 (7)            | 1 (1)                          |
| Safety/futility           | 8 (13)            | 2 (13)           | 4 (21)            | 5 (38)           | 5 (23)            | 6 (43)           | 30 (21)                        |
| Efficacy/safety/futility  |                   |                  |                   |                  |                   |                  |                                |
| National or international | 26 (43)           | 11 (73)          | 4 (21)            | 11 (85)          | 6 (27)            | 12 (86)          | 70 (49)                        |
| National                  | 32 (53)           | 4 (27)           | 15 (79)           | 2 (15)           | 16 (73)           | 2 (14)           | 71 (50)                        |
| International             |                   |                  |                   |                  |                   |                  |                                |

*continued on next page*

*continued from previous page*

| Variable                             | Phase II          |                  | Phase II/III      |                  | Phase III         |                  | All Phases<br>Total<br>(n=143) |
|--------------------------------------|-------------------|------------------|-------------------|------------------|-------------------|------------------|--------------------------------|
|                                      | Private<br>(n=60) | Public<br>(n=15) | Private<br>(n=19) | Public<br>(n=13) | Private<br>(n=22) | Public<br>(n=14) |                                |
| Unknown                              | 2 (3)             | 0 (0)            | 0 (0)             | 0 (0)            | 0 (0)             | 0 (0)            | 2 (1)                          |
| State of study <sup>2</sup>          |                   |                  |                   |                  |                   |                  |                                |
| Active, not recruiting               | 0 (0)             | 0 (0)            | 0 (0)             | 2 (15)           | 0 (0)             | 0 (0)            | 2 (1)                          |
| Recruiting                           | 17 (28)           | 12 (80)          | 6 (32)            | 8 (62)           | 3 (14)            | 5 (36)           | 51 (36)                        |
| Ongoing after recruitment            | 6 (10)            | 0 (0)            | 1 (5)             | 0 (0)            | 4 (18)            | 1 (7)            | 12 (8)                         |
| Completed                            | 30 (50)           | 1 (7)            | 7 (37)            | 3 (23)           | 9 (41)            | 5 (36)           | 55 (38)                        |
| Terminated after recruitment         | 5 (8)             | 2 (13)           | 5 (26)            | 0 (0)            | 6 (27)            | 3 (21)           | 21 (15)                        |
| Terminated before enrolment          | 2 (3)             | 0 (0)            | 0 (0)             | 0 (0)            | 0 (0)             | 0 (0)            | 2 (1)                          |
| Population                           |                   |                  |                   |                  |                   |                  |                                |
| < 16                                 | 3 (5)             | 2 (13)           | 3 (16)            | 1 (8)            | 1 (5)             | 0 (0)            | 10 (7)                         |
| ≥ 16                                 | 52 (87)           | 11 (73)          | 12 (63)           | 9 (69)           | 19 (86)           | 13 (93)          | 116 (81)                       |
| > 50 only <sup>3</sup>               | 4 (7)             | 1 (7)            | 4 (21)            | 1 (8)            | 1 (5)             | 1 (7)            | 12 (8)                         |
| All ages                             | 1 (2)             | 1 (7)            | 0 (0)             | 2 (15)           | 1 (5)             | 0 (0)            | 5 (3)                          |
| Primary outcome(s)                   |                   |                  |                   |                  |                   |                  |                                |
| Binary                               | 8 (13)            | 3 (20)           | 0 (0)             | 4 (31)           | 5 (23)            | 4 (29)           | 24 (17)                        |
| Continuous                           | 47 (78)           | 11 (73)          | 16 (84)           | 4 (31)           | 9 (41)            | 4 (29)           | 91 (64)                        |
| Time to event                        | 1 (2)             | 0 (0)            | 2 (11)            | 3 (23)           | 6 (27)            | 3 (21)           | 15 (10)                        |
| Ordinal                              | 2 (3)             | 1 (7)            | 0 (0)             | 2 (15)           | 0 (0)             | 1 (7)            | 6 (4)                          |
| Categorical                          | 1 (2)             | 0 (0)            | 0 (0)             | 0 (0)            | 1 (5)             | 0 (0)            | 2 (1)                          |
| Continuous and time to event         | 0 (0)             | 0 (0)            | 1 (5)             | 0 (0)            | 1 (5)             | 0 (0)            | 2 (1)                          |
| Continuous and binary                | 0 (0)             | 0 (0)            | 0 (0)             | 0 (0)            | 0 (0)             | 1 (7)            | 1 (1)                          |
| Continuous, binary and time to event | 1 (2)             | 0 (0)            | 0 (0)             | 0 (0)            | 0 (0)             | 1 (7)            | 2 (1)                          |
| Trial intervention                   |                   |                  |                   |                  |                   |                  |                                |
| Drug                                 | 59 (98)           | 10 (67)          | 19 (100)          | 7 (54)           | 19 (86)           | 9 (64)           | 123 (86)                       |
| Device                               | 0 (0)             | 2 (13)           | 0 (0)             | 2 (15)           | 2 (9)             | 4 (29)           | 10 (7)                         |
| Diet                                 | 0 (0)             | 1 (7)            | 0 (0)             | 0 (0)            | 0 (0)             | 0 (0)            | 1 (1)                          |
| Psychological                        | 0 (0)             | 0 (0)            | 0 (0)             | 1 (8)            | 0 (0)             | 0 (0)            | 1 (1)                          |
| Physiological                        | 0 (0)             | 0 (0)            | 0 (0)             | 1 (8)            | 0 (0)             | 0 (0)            | 1 (1)                          |

*continued on next page*

continued from previous page

| Variable                           | Phase II          |                  | Phase II/III      |                  | Phase III         |                  | All Phases<br>Total<br>(n=143) |
|------------------------------------|-------------------|------------------|-------------------|------------------|-------------------|------------------|--------------------------------|
|                                    | Private<br>(n=60) | Public<br>(n=15) | Private<br>(n=19) | Public<br>(n=13) | Private<br>(n=22) | Public<br>(n=14) |                                |
| Drug and device                    | 0 (0)             | 1 (7)            | 0 (0)             | 1 (8)            | 1 (5)             | 0 (0)            | 3 (2)                          |
| Education and diet                 | 0 (0)             | 0 (0)            | 0 (0)             | 1 (8)            | 0 (0)             | 0 (0)            | 1 (1)                          |
| Drug and diet                      | 1 (2)             | 1 (7)            | 0 (0)             | 0 (0)            | 0 (0)             | 1 (7)            | 3 (2)                          |
| Number of trial arms <sup>4</sup>  |                   |                  |                   |                  |                   |                  |                                |
| 1                                  | 16 (27)           | 8 (53)           | 5 (26)            | 9 (69)           | 13 (59)           | 11 (79)          | 62 (43)                        |
| 2                                  | 14 (23)           | 4 (27)           | 7 (37)            | 2 (15)           | 6 (27)            | 1 (7)            | 34 (24)                        |
| 3                                  | 10 (17)           | 3 (20)           | 4 (21)            | 0 (0)            | 2 (9)             | 0 (0)            | 19 (13)                        |
| 4                                  | 9 (15)            | 0 (0)            | 2 (11)            | 1 (8)            | 1 (5)             | 1 (7)            | 14 (10)                        |
| ≥ 5                                | 11 (18)           | 0 (0)            | 1 (5)             | 1 (8)            | 0 (0)             | 1 (7)            | 14 (10)                        |
| Duration of primary outcome (days) | 60 {76}           | 120 {315}        | 84 {88}           | 365 {29}         | 336 {214}         | 88 {252}         | 84 {224}                       |
| Sample size                        | 200 {178}         | 138 {150}        | 306 {667}         | 300 {849}        | 451 {534}         | 1417 {2459}      | 240 {368}                      |

Results presented as n (%) or median {IQR}.

<sup>1</sup> Other therapeutic areas include: detached placenta, gastric ulcers, venous thromboembolism, lower urinary tract symptoms, septic shock, visceral leishmaniasis, chronic abacterial prostatitis, anemia, primary visceral leishmaniasis, ulcer and pre-eclampsia.

<sup>2</sup> As of September 2014.

<sup>3</sup> > 50 only trials not included in ≥ 16 category.

<sup>4</sup> Excludes comparator arm. Number of arms in multi-arm multi-stage (MAMS) design taken to be the original starting number.
